# Supplementary material for: Rapid, Dynamic Activation of Müller Glial Stem Cell Responses in Zebrafish
Source: PubMed Central journal article supplement — Invest Ophthalmol Vis Sci. 2016 Oct;57(13):5148–60. doi: 10.1167/iovs.16-19973 (PMC5054728; doi:10.1167/iovs.16-19973), 2016-10
Supplement: iovs-57-12-19_s05.pdf [file iovs-57-12-19_s05.pdf]

**Table S1.** Primer sets used for RT-qPCR validation of RNA-seq data.

| <b>Target</b> | <b>Forward</b>           | <b>Reverse</b>         |
|---------------|--------------------------|------------------------|
| <i>tgif1</i>  | AATACTCCGGGACTGGCTCT     | CAGTTGCAAACCTGTAGTGTGG |
| <i>crlf1a</i> | ATGAGATATGGGTGGAGGCG     | GATCTGTCGTCACCACGTCT   |
| <i>hspd1</i>  | GTCATTAAGGTCGGAGGAACAAG  | GCGCAGTAAAGCACATCCTC   |
| <i>C7</i>     | GTGTGTAGGCCAGGAACCAG     | GGGGCTCCAAGATTTTGAGGT  |
| <i>ptges</i>  | GGGCTTAACGGACTGGCTTC     | GGGCTTAACGGACTGGCTTC   |
| <i>mmp9</i>   | GGTGGTCCCTTCAGACGATG     | TTCCAGTAGCGCCCGTC      |
| <i>gpia</i>   | ACTCCTGCCTCATAAAGTTTTCCA | ACATCACACCCTGCACGAAG   |

**Table S2.** Top 20 positively and negatively regulated known zebrafish genes at 8 hours post lesion. Only genes with a false discovery rate  $\leq 0.05$  are considered differentially expressed. \*Denotes projected HUGO Gene Nomenclature Committee (HGNC) symbol for zebrafish genes that have not yet been assigned an official name. 11 uncharacterized genes were removed from the top 20 positively regulated genes. 17 uncharacterized genes were removed from the top 20 negatively regulated genes.

### Positively regulated

| Symbol          | Name                                                        | log <sub>2</sub> FC |
|-----------------|-------------------------------------------------------------|---------------------|
| <i>soul5</i>    | heme-binding protein soul5                                  | 7.75                |
| <i>lepb</i>     | leptin b                                                    | 7.64                |
| <i>crtac1a</i>  | cartilage acidic protein 1a                                 | 7.55                |
| <i>wdr76</i>    | WD repeat domain 76                                         | 6.56                |
| <i>hspb11</i>   | heat shock protein, alpha-crystallin-related, b11           | 6.51                |
| <i>blvra</i>    | biliverdin reductase A                                      | 6.41                |
| <i>fam213b</i>  | family with sequence similarity 213, member B               | 6.41                |
| <i>C7*</i>      | complement component 7                                      | 6.22                |
| <i>tspo</i>     | translocator protein                                        | 6.03                |
| <i>ccl34a.4</i> | chemokine (C-C motif) ligand 34a, duplicate 4               | 5.94                |
| <i>nfil3</i>    | nuclear factor, interleukin 3 regulated                     | 5.70                |
| <i>cry5</i>     | cryptochrome 5                                              | 5.59                |
| <i>nfil3-2</i>  | nuclear factor, interleukin 3 regulated, member 2           | 5.47                |
| <i>rorcb</i>    | RAR-related orphan receptor C b                             | 5.38                |
| <i>per2</i>     | period circadian clock 2                                    | 5.36                |
| <i>nfil3-5</i>  | nuclear factor, interleukin 3 regulated, member 5           | 5.24                |
| <i>ASB5*</i>    | ankyrin repeat and SOCS box containing 5                    | 4.933               |
| <i>cpa2</i>     | carboxypeptidase A2                                         | 4.82                |
| <i>slc27a6</i>  | solute carrier family 27 (fatty acid transporter), member 6 | 4.81                |
| <i>med11</i>    | mediator complex subunit 11                                 | 4.56                |

### Negatively regulated

| Symbol          | Name                                                                           | log <sub>2</sub> FC |
|-----------------|--------------------------------------------------------------------------------|---------------------|
| <i>smu1b</i>    | smu-1 suppressor of mec-8 and unc-52 homolog b                                 | -4.15               |
| <i>SUSD3*</i>   | sushi domain containing 3                                                      | -3.86               |
| <i>her4.1</i>   | hairy-related 4, tandem duplicate 1                                            | -3.83               |
| <i>cnga3a</i>   | cyclic nucleotide gated channel alpha 3a                                       | -3.81               |
| <i>mef2ca</i>   | myocyte enhancer factor 2ca                                                    | -3.65               |
| <i>U1</i>       | U1 spliceosomal RNA                                                            | -3.52               |
| <i>slc25a24</i> | solute carrier family 25 (mitochondrial carrier; phosphate carrier), member 24 | -3.51               |
| <i>myo16</i>    | myosin XVI                                                                     | -3.45               |
| <i>ker1a</i>    | keratocan                                                                      | -3.36               |
| <i>MEF2A*</i>   | myocyte enhancer factor 2A                                                     | -3.34               |
| <i>krt4</i>     | keratin 4                                                                      | -3.33               |

|                  |                                                        |       |
|------------------|--------------------------------------------------------|-------|
| <i>bhlhe41</i>   | basic helix-loop-helix family, member e41              | -3.28 |
| <i>per1a</i>     | period circadian clock 1a                              | -3.23 |
| <i>nr2e3</i>     | nuclear receptor subfamily 2, group E, member 3        | -3.18 |
| <i>col17a1a</i>  | collagen, type XVII, alpha 1a                          | -3.15 |
| <i>pacs2</i>     | phosphofurin acidic cluster sorting protein 2          | -3.08 |
| <i>dbpb</i>      | D site albumin promoter binding protein b              | -3.05 |
| <i>cyp26a1</i>   | cytochrome P450, family 26, subfamily A, polypeptide 1 | -3.04 |
| <i>ankrd33aa</i> | ankyrin repeat domain 33Aa                             | -2.99 |
| <i>cnksr2a</i>   | connector enhancer of kinase suppressor of Ras 2a      | -2.99 |

**Table S3.** Top 20 positively and negatively regulated known zebrafish genes at 16 hours post lesion. Only genes with a false discovery rate  $\leq 0.05$  are considered differentially expressed. \*Denotes projected HUGO Gene Nomenclature Committee (HGNC) symbol for zebrafish genes that have not yet been assigned an official name. 17 uncharacterized genes were removed from the top 20 positively regulated genes. 23 uncharacterized genes were removed from the top 20 negatively regulated genes.

### Positively regulated

| Symbol          | Name                                                | log <sub>2</sub> FC |
|-----------------|-----------------------------------------------------|---------------------|
| <i>lepb</i>     | leptin b                                            | 10.02               |
| <i>C7*</i>      | complement component 7                              | 7.36                |
| <i>cpa2</i>     | carboxypeptidase A2                                 | 6.49                |
| <i>lin28a</i>   | lin-28 homolog A                                    | 6.45                |
| <i>ankrd1a</i>  | ankyrin repeat domain 1a                            | 5.55                |
| <i>crlf1a</i>   | cytokine receptor-like factor 1a                    | 5.52                |
| <i>ccl34a.4</i> | chemokine (C-C motif) ligand 34a, duplicate 4       | 5.15                |
| <i>cpa4</i>     | carboxypeptidase A4                                 | 4.89                |
| <i>med11</i>    | mediator complex subunit 11                         | 4.86                |
| <i>adam8a</i>   | ADAM metallopeptidase domain 8a                     | 4.55                |
| <i>lygl1</i>    | lysozyme g-like 1                                   | 4.54                |
| <i>ASB5*</i>    | ankyrin repeat and SOCS box containing 5            | 4.49                |
| <i>nr1d4a</i>   | nuclear receptor subfamily 1, group D, member 4a    | 4.46                |
| <i>c6</i>       | complement component 6                              | 4.45                |
| <i>HTRA2*</i>   | HtrA serine peptidase 2                             | 4.41                |
| <i>clcf1</i>    | cardiotrophin-like cytokine factor 1                | 4.41                |
| <i>mvp</i>      | major vault protein                                 | 4.12                |
| <i>phlda2</i>   | pleckstrin homology-like domain, family A, member 2 | 4.08                |
| <i>mmp9</i>     | matrix metallopeptidase 9                           | 4.01                |
| <i>crtac1a</i>  | cartilage acidic protein 1a                         | 4.01                |

### Negatively regulated

| Symbol           | Name                                                       | log <sub>2</sub> FC |
|------------------|------------------------------------------------------------|---------------------|
| <i>aplnra</i>    | apelin receptor a                                          | -6.23               |
| <i>TNFRSF14*</i> | tumor necrosis factor receptor superfamily, member 14      | -4.30               |
| <i>fdx1b</i>     | ferredoxin 1b                                              | -4.01               |
| <i>hes2.1</i>    | hes family bHLH transcription factor 2, tandem duplicate 1 | -3.85               |
| <i>GPT*</i>      | glutamic-pyruvate transaminase (alanine aminotransferase)  | -3.07               |
| <i>bik</i>       | BCL2-interacting killer (apoptosis-inducing)               | -3.06               |
| <i>hhatla</i>    | hedgehog acyltransferase-like, a                           | -2.58               |
| <i>myo3b</i>     | myosin IIIB                                                | -2.40               |
| <i>foxq2</i>     | forkhead box Q2                                            | -2.34               |
| <i>SUSD3*</i>    | sushi domain containing 3                                  | -2.33               |
| <i>opn1sw2</i>   | opsin 1 (cone pigments), short-wave-sensitive 2            | -2.28               |
| <i>opn1mw2</i>   | opsin 1 (cone pigments), medium-wave-sensitive, 2          | -2.23               |

|                 |                                                                                          |       |
|-----------------|------------------------------------------------------------------------------------------|-------|
| <i>Irrfip1a</i> | leucine rich repeat (in FLII) interacting protein 1a                                     | -2.22 |
| <i>esrrgb</i>   | estrogen-related receptor gamma b                                                        | -2.17 |
| <i>gnat2</i>    | guanine nucleotide binding protein (G protein), alpha transducing activity polypeptide 2 | -2.16 |
| <i>FNDC4*</i>   | fibronectin type III domain containing 4                                                 | -2.11 |
| <i>coro2bb</i>  | coronin, actin binding protein, 2Bb                                                      | -2.08 |
| <i>sema7a</i>   | semaphorin 7A                                                                            | -2.05 |
| <i>cplx4b</i>   | complexin 4b                                                                             | -2.03 |
| <i>rgs9a</i>    | regulator of G-protein signaling 9a                                                      | -2.01 |

**Table S4.** Published datasets used for analysis of isolated Müller glia and photoreceptors.

| <b>Sample Description</b>                                                        | <b>Platform type; Name; Accession</b>                                                               | <b>Dataset URL</b>                                                                                                                  | <b>GEO Accession</b> | <b>Supplementary Reference</b> |
|----------------------------------------------------------------------------------|-----------------------------------------------------------------------------------------------------|-------------------------------------------------------------------------------------------------------------------------------------|----------------------|--------------------------------|
| Unlesioned FACS Adult Müller glia; zebrafish                                     | Microarray; [Zebrafish] Affymetrix Zebrafish Genome Array; GPL1319                                  | <a href="http://www.ncbi.nlm.nih.gov/geo/query/acc.cgi?acc=GSE14495">http://www.ncbi.nlm.nih.gov/geo/query/acc.cgi?acc=GSE14495</a> | GSE14495             | 26                             |
| Unlesioned FACS Adult Müller glia; zebrafish                                     | Microarray; Agilent-015064 D. rerio (Zebrafish) Oligo Microarray 4x44K G2519F; GPL7302              | <a href="http://www.ncbi.nlm.nih.gov/geo/query/acc.cgi?acc=GSE36191">http://www.ncbi.nlm.nih.gov/geo/query/acc.cgi?acc=GSE36191</a> | GSE36191             | 27                             |
| 1 day post PBS injection FACS Adult Müller glia; mouse                           | Microarray; [Mouse430_2] Affymetrix Mouse Genome 430 2.0 Array; GPL1261                             | <a href="http://www.ncbi.nlm.nih.gov/geo/query/acc.cgi?acc=GSE27195">http://www.ncbi.nlm.nih.gov/geo/query/acc.cgi?acc=GSE27195</a> | GSE27195             | 28                             |
| P0 and P21 FACS Müller glia; mouse                                               | Microarray; [MoGene-1_0-st] Affymetrix Mouse Gene 1.0 ST Array [transcript (gene) version]; GPL6246 | <a href="http://www.ncbi.nlm.nih.gov/geo/query/acc.cgi?acc=GSE45835">http://www.ncbi.nlm.nih.gov/geo/query/acc.cgi?acc=GSE45835</a> | GSE45835             | 29                             |
| Hand-picked 8wk and P13 Wild-type Müller glia; mouse                             | Microarray; [Mouse430_2] Affymetrix Mouse Genome 430 2.0 Array; GPL1261                             | <a href="http://www.ncbi.nlm.nih.gov/geo/query/acc.cgi?acc=GSE35386">http://www.ncbi.nlm.nih.gov/geo/query/acc.cgi?acc=GSE35386</a> | GSE35386             | 19                             |
| 8-11wk FACS Rod and FACS Cone photoreceptors; mouse                              | RNA-seq; Illumina HiSeq2500; N/A                                                                    | <a href="http://www.ncbi.nlm.nih.gov/geo/query/acc.cgi?acc=GSE72550">http://www.ncbi.nlm.nih.gov/geo/query/acc.cgi?acc=GSE72550</a> | GSE72550             | 30                             |
| P28 FACS Rod and S-cone-like ( <i>Nrl</i> <sup>-/-</sup> ) photoreceptors; mouse | RNA-seq; Illumina Genome Analyzer IIx; N/A                                                          | <a href="http://www.ncbi.nlm.nih.gov/geo/query/acc.cgi?acc=GSE74660">http://www.ncbi.nlm.nih.gov/geo/query/acc.cgi?acc=GSE74660</a> | GSE74660             | 31                             |

**Table S5.** Cell-type specific transcripts used for analysis of contaminating transcripts.

| <b>Gene Symbol<br/>(zebrafish, mouse)</b> | <b>Description</b>                          | <b>Specificity</b> |
|-------------------------------------------|---------------------------------------------|--------------------|
| <i>gfap, Gfap</i>                         | <i>glial fibrillary acidic protein</i>      | Müller glia        |
| <i>rlbp1a, Rlbp1</i>                      | <i>retinaldehyde binding protein 1(a)</i>   | Müller glia        |
| <i>rho, Rho</i>                           | <i>rhodopsin</i>                            | Rod photoreceptor  |
| <i>gnat1, Gnat1</i>                       | <i>G-protein subunit alpha transducin 1</i> | Rod photoreceptor  |
| <i>gnat2, Gnat2</i>                       | <i>G-protein subunit alpha transducin 2</i> | Cone photoreceptor |
